# Supplementary material for: Cohort profile: Dementia in the Registry of Senior Australians
Source: HighWire-hosted journal article supplement (doi:10.1136/bmjopen-2020-039907), 2021-02-01
Supplement: bmjopen-2020-039907supp001_data_supplement.pdf [file bmjopen-2020-039907supp001_data_supplement.pdf]

## SUPPLEMENTARY MATERIALS

Supplementary Table 1. The ROSA Dementia Cohort Comprehensive Demographic and Clinical Characteristics

|                                                          |                              | <i>n</i> (%)                |
|----------------------------------------------------------|------------------------------|-----------------------------|
|                                                          |                              | All<br>( <i>n</i> =373,695) |
| Age at cohort entry (mean, SD)                           |                              | 84.1 (6.9)                  |
|                                                          | 65-69                        | 11,181 (3.0)                |
|                                                          | 70-79                        | 78,409 (21.0)               |
|                                                          | 80-89                        | 202,519 (54.2)              |
|                                                          | >89                          | 81,586 (21.8)               |
| Sex                                                      |                              |                             |
|                                                          | Female                       | 235,703 (63.1)              |
|                                                          | Male                         | 137,943 (36.9)              |
|                                                          | Missing                      | 49 (0.1)                    |
| Country of birth                                         |                              |                             |
|                                                          | Australia                    | 348,396 (66.5)              |
|                                                          | Outside Australia            | 123,009 (32.9)              |
|                                                          | Missing                      | 2290 (0.6)                  |
| Language                                                 |                              |                             |
|                                                          | English                      | 329,108 (88.1)              |
|                                                          | Other                        | 42,779 (11.5)               |
|                                                          | Missing                      | 1808 (0.5)                  |
| State                                                    |                              |                             |
|                                                          | New South Wales              | 127,830 (34.2)              |
|                                                          | Victoria                     | 92,911 (24.9)               |
|                                                          | Queensland                   | 63,986 (17.1)               |
|                                                          | Western Australia            | 35,689 (9.6)                |
|                                                          | South Australia              | 34,252 (9.2)                |
|                                                          | Tasmania                     | 9379 (2.5)                  |
|                                                          | Northern Territory           | 780 (0.2)                   |
|                                                          | Australian Capital Territory | 4114 (1.10)                 |
|                                                          | Missing                      | 4754 (1.3)                  |
| ARIA Region <sup>a</sup>                                 |                              |                             |
|                                                          | Major city                   | 245,083 (65.6)              |
|                                                          | Inner regional               | 78,320 (21.0)               |
|                                                          | Outer regional               | 37,378 (10.0)               |
|                                                          | Remote                       | 4074 (1.1)                  |
|                                                          | Very remote                  | 1307 (0.4)                  |
|                                                          | Missing                      | 7533 (2.0)                  |
| Socio-economic status (derived from postcode using IRSD) |                              |                             |
|                                                          | Most Disadvantaged -1        | 61,573 (16.5)               |
|                                                          | 2                            | 63,830 (17.1)               |
|                                                          | 3                            | 65,613 (17.6)               |
|                                                          | 4                            | 70,050 (18.8)               |
|                                                          | Least Disadvantaged- 5       | 105,029 (18.8)              |
|                                                          | Missing                      | 7600 (2.0)                  |
| Marital status                                           |                              |                             |
|                                                          | Married                      | 133,647 (35.8)              |
|                                                          | Separated or divorced        | 23,727 (6.3)                |
|                                                          | Widowed                      | 176,949 (47.4)              |
|                                                          | Never married                | 17,950 (4.8)                |
|                                                          | Missing                      | 21,412 (5.7)                |
| Carer availability <sup>b</sup> ( <i>n</i> =214,780)     |                              |                             |
|                                                          | Has carer                    | 185,118 (86.2)              |
|                                                          | No carer                     | 14,781 (6.9)                |
|                                                          | Missing                      | 14,836 (6.9)                |

|                                                                           | <i>n</i> (%)                |
|---------------------------------------------------------------------------|-----------------------------|
|                                                                           | All<br>( <i>n</i> =373,695) |
| Carer relationship <sup>b</sup> ( <i>n</i> =185,118)                      |                             |
| Spouse                                                                    | 80,094 (43.3)               |
| Parent                                                                    | 164 (0.9)                   |
| Child or child-in-law                                                     | 88,105 (47.6)               |
| Other relative                                                            | 10,075 (5.4)                |
| Friend/neighbour                                                          | 5967 (3.2)                  |
| Missing                                                                   | 676 (0.4)                   |
| Carer co-residency <sup>b</sup> ( <i>n</i> =185,118)                      | 117,617 (63.5)              |
| Dementia identified                                                       |                             |
| Medicine dispensing only                                                  | 3694 (1.0)                  |
| ACAP or medicine dispensing only                                          | 62,417 (16.7)               |
| ACFI or medicine dispensing only                                          | 161,135 (43.1)              |
| Both ACAP and ACFI                                                        | 146,449 (39.2)              |
| Dementia first identified using <sup>c</sup>                              |                             |
| ACAP                                                                      | 207,346 (55.5)              |
| ACFI                                                                      | 166,349 (44.5)              |
| Number Medical Conditions (median, IQR) <sup>f</sup>                      | 4 (4-6)                     |
| 0                                                                         | 11,862 (3.2)                |
| 1-4                                                                       | 170,826 (45.7)              |
| 5-9                                                                       | 151,358 (40.5)              |
| 10+                                                                       | 13,747 (3.7)                |
| Missing                                                                   | 25,875 (6.9)                |
| Activity limitations <sup>b</sup> ( <i>n</i> =214,780)                    |                             |
| None                                                                      | 405 (0.2)                   |
| Communication                                                             | 66,745 (31.1)               |
| Domestic assistance                                                       | 190,642 (88.8)              |
| Health care tasks                                                         | 199,163 (92.7)              |
| Home maintenance                                                          | 161,220 (75.1)              |
| Meals                                                                     | 186,390 (86.8)              |
| Movement activities                                                       | 60,528 (28.2)               |
| Moving around places                                                      | 139,482 (64.9)              |
| Self-care                                                                 | 164,446 (76.6)              |
| Transport                                                                 | 203,395 (94.7)              |
| Social and community participation                                        | 198,743 (92.5)              |
| Other                                                                     | 12,478 (5.8)                |
| Most common co-morbidities at cohort entry                                |                             |
| Arthritis (rheumatoid and other)                                          | 130,824 (35.0)              |
| Hypertension                                                              | 130,569 (34.9)              |
| Heart diseases                                                            | 118,274 (31.7)              |
| Falls                                                                     | 58,136 (15.6)               |
| Cerebrovascular disease                                                   | 57,772 (15.5)               |
| Osteoporosis                                                              | 54,555 (14.6)               |
| Diabetes – type 2                                                         | 54,026 (14.5)               |
| Abnormalities of gait and mobility                                        | 48,151 (12.9)               |
| Deafness/hearing loss                                                     | 41,480 (11.1)               |
| Hypercholesterolemia                                                      | 14,043 (9.1)                |
| Cornell Scale for Depression <sup>g</sup> ( <i>n</i> =122,253) (mean, SD) | 11.7 (6.7)                  |
| Dead at June 30 2016                                                      | 249,682 (66.8)              |
| Age at death ( <i>n</i> =249,682) (mean, SD)                              | 87.5 (6.6)                  |
| Years from cohort entry to death ( <i>n</i> =249,682) (mean, SD)          | 2.1 (1.7)                   |
| Primary cause of death ( <i>n</i> =249,682)                               |                             |
| Circulatory disease                                                       | 87,604 (35.1)               |
| Heart disease                                                             | 54,412 (21.8)               |
| Cerebrovascular disease                                                   | 30,246 (21.1)               |

|                                           |                      | <i>n</i> (%)                |
|-------------------------------------------|----------------------|-----------------------------|
|                                           |                      | All<br>( <i>n</i> =373,695) |
| Dementias                                 |                      | 66,287 (26.5)               |
|                                           | Unspecified dementia | 38,019 (15.2)               |
|                                           | Alzheimer's disease  | 21,090 (8.4)                |
|                                           | Vascular dementia    | 7178 (2.9)                  |
| Respiratory disease (including pneumonia) |                      | 19,675 (7.9)                |
| Other causes                              |                      | 76,116 (30.5)               |

ACAP=Aged Care Assessment Program; ACFI=Aged Care Funding Instrument;  
ARIA=Accessibility/Remoteness Index of Australia; IQR=Interquartile range; IRSD=Index of  
Relative Socio-Economic Disadvantage; SD=Standard deviation

<sup>a</sup> Remoteness categories are from the Accessibility/Remoteness Index of Australia Plus (ARIA+) 2016. These have also been linked to the cohort based on the postcode at the time of the assessment.

<sup>b</sup> From ACAP recordings – includes ACAP data for *n*=7,434 individuals who entered the ROSA dementia cohort from an earlier ACFI assessment.

<sup>c</sup> Or medicine dispensing closest to one of these

<sup>d</sup> From July 2008

<sup>e</sup> To June 2016

<sup>f</sup> From RxRisk, medicine-based comorbidity measure

<sup>g</sup> From ACFI recordings – includes ACFI data (at entry to permanent residential aged care) for some individuals who entered the ROSA dementia cohort from an earlier ACAT assessment
